# Supplementary material
Source: PubMed Central journal article supplement (PMC2913179)
Supplement: mmc1.pdf [file mmc1.pdf]

Biophysical Journal, Volume 99

**Supporting Material**

**Attractive Protein-Polymer Interactions Markedly Alter the Effect of Macromolecular Crowding on Protein Association Equilibria**

Ming Jiao, Hong-Tao Li, Jie Chen, Allen Minton, and Yi Liang

*Supplemental information*

*Biophysical Journal, in press (May 2010)*

**Attractive Protein-Polymer Interactions Markedly Alter the Effect of  
Macromolecular Crowding on Protein Association Equilibria**

**Ming Jiao<sup>†</sup>, Hong-Tao Li<sup>†</sup>, Jie Chen<sup>†</sup>, Allen P. Minton<sup>‡,1</sup>, and Yi Liang<sup>†,1</sup>**

<sup>†</sup>State Key Laboratory of Virology, College of Life Sciences, Wuhan University,  
Wuhan 430072, China; and <sup>‡</sup>Laboratory of Biochemistry and Genetics, National  
Institute of Diabetes and Digestive and Kidney Diseases, National Institutes of Health,  
Bethesda, MD 20892

Running Title: Temperature dependent crowding

<sup>1</sup> To whom correspondence should be addressed:

APM: [minton@helix.nih.gov](mailto:minton@helix.nih.gov); YL: [liangyi@whu.edu.cn](mailto:liangyi@whu.edu.cn)

## Supplemental Data

**TABLE S1**

**Best-fit values  $\pm$  2 standard errors of estimate (95% confidence limits) of  $\log_{10} K_a$  and  $\ln \Gamma$ .**

| $T$ ( $^{\circ}\text{C}$ ) | Additive        | Additive concentration (g/l) | $\log_{10} K_a$ | $\ln \Gamma$     |
|----------------------------|-----------------|------------------------------|-----------------|------------------|
| 37.0                       | none            |                              | $5.0 \pm 0.1$   |                  |
|                            | Dextran 70      | 200                          | $6.1 \pm 0.2$   | $2.5 \pm 0.7$    |
|                            | Ficoll 70       | 200                          | $6.65 \pm 0.15$ | $3.8 \pm 0.6$    |
|                            | PEG 2000        | 200                          | $6.4 \pm 0.1$   | $3.2 \pm 0.5$    |
| 30.0                       | none            |                              | $4.95 \pm 0.10$ |                  |
|                            | Dextran 70      | 200                          | $5.85 \pm 0.20$ | $2.1 \pm 0.7$    |
|                            | Ficoll 2000     | 200                          | $6.25 \pm 0.10$ | $3.00 \pm 0.45$  |
|                            | PEG 2000        | 200                          | $6.05 \pm 0.10$ | $2.55 \pm 0.45$  |
| 25.0                       | none            |                              | $4.9 \pm 0.2$   |                  |
|                            |                 |                              | $4.70 \pm 0.05$ |                  |
|                            | glycerol        | 100                          | $4.8 \pm 0.3$   | $-0.25 \pm 1.15$ |
|                            |                 | 200                          | $4.7 \pm 0.4$   | $-0.45 \pm 1.40$ |
|                            |                 | 300                          | $4.6 \pm 0.5$   | $-0.7 \pm 1.6$   |
|                            | Dextran 70      | 100                          | $5.55 \pm 0.25$ | $1.5 \pm 1.0$    |
|                            |                 | 200                          | $5.65 \pm 0.25$ | $1.70 \pm 1.05$  |
|                            |                 | 300                          | $6.1 \pm 0.2$   | $2.75 \pm 0.90$  |
|                            | Ficoll 70       | 100                          | $5.3 \pm 0.2$   | $0.45 \pm 0.80$  |
|                            |                 | 200                          | $5.8 \pm 0.3$   | $2.30 \pm 1.15$  |
|                            |                 | 200                          | $5.95 \pm 0.05$ | $2.65 \pm 0.25$  |
|                            | PEG 2000        | 300                          | $6.0 \pm 0.2$   | $2.5 \pm 0.9$    |
| 100                        |                 | $5.3 \pm 0.2$                | $0.9 \pm 0.9$   |                  |
| 200                        |                 | $5.75 \pm 0.15$              | $1.95 \pm 0.80$ |                  |
| 300                        | $5.80 \pm 0.15$ | $2.05 \pm 0.80$              |                 |                  |
| 15.0                       | none            |                              | $4.60 \pm 0.15$ |                  |
|                            | Dextran 70      | 200                          | $4.9 \pm 0.5$   | $0.7 \pm 1.5$    |
|                            | Ficoll 70       | 200                          | $5.0 \pm 0.5$   | $0.9 \pm 1.5$    |
|                            | PEG 2000        | 200                          | $4.8 \pm 0.3$   | $0.70 \pm 1.05$  |
| 8.0                        | none            |                              | $3.95 \pm 0.20$ |                  |
|                            | Dextran 70      | 200                          | $4.00 \pm 0.15$ | $0.05 \pm 0.80$  |
|                            | Ficoll 70       | 200                          | $3.95 \pm 0.20$ | $0.0 \pm 0.9$    |
|                            | PEG 2000        | 200                          | $3.85 \pm 0.20$ | $-0.2 \pm 0.9$   |

## Thermodynamic description of the effect of nonideality on binding of a ligand to a protein bearing $n$ equivalent binding sites

Let protein A have  $n$  equivalent and noninteracting binding sites for protein B. We denote the equilibrium association constant for binding a molecule of B to a molecule of  $AB_{i-1}$  by  $K_i$ . Due to the change in number of available binding sites as A becomes progressively saturated with B,

$$K_i = \frac{(i-1)!(n-i+1)!}{i!(n-i)!} K_{i,site} \quad (S1)$$

where  $K_{i,site}$  denotes the equilibrium constant for binding of B to an individual site on A. Since we have specified that these sites are equivalent and non-interacting, it follows that in the ideal limit

$$K_{i,site}^0 = K_{site}^0 \quad (S2)$$

However, in the general case (text reference 7)

$$K_{i,site} = \frac{\gamma_B \gamma_{AB_{i-1}}}{\gamma_{AB_i}} K_{i,site}^0 = \frac{\gamma_B \gamma_{AB_{i-1}}}{\gamma_{AB_i}} K_{site}^0 \quad (S3)$$

It follows from equations (S1) and (S3) that one can define a distinct nonideality factor for each sequential binding step

$$\Gamma_i = \frac{K_i}{K_i^0} = \frac{\gamma_B \gamma_{AB_{i-1}}}{\gamma_{AB_i}} \quad (S4)$$

In principle, nonspecific interactions between polymeric crowder and the trace proteins could have a differential effect upon the values of successive binding constants, and hence upon the shape and position of the overall binding isotherm. To obtain a numerical estimate of the magnitude of this effect we calculated the radius and surface area of spheres with masses equal to that of catalase with 0 to 4 molecules of bound SOD, and partial specific volume  $0.73 \text{ cm}^3/\text{g}$ . Using these values together with Equations 11 and 13 in the text, we estimate that the ratio  $\gamma_{AB_{i-1}}/\gamma_{AB_i}$ , and hence

the value of  $\Gamma_i$ , varies by no more than about 10% as  $i$  increases from 1 to 4. To a

good approximation, for the system catalase + SOD, we may set  $\Gamma_i \approx \Gamma$ , and the

predicted binding isotherm should closely resemble a single site binding isotherm under highly nonideal as well as ideal conditions. This prediction is borne out by our fluorescence titrations carried out in highly nonideal solution, all of which are fit with excellent precision by calculated single site isotherms (text Equations 2 and 3).
